# Supplementary material for: Selective nitrogen doping on porous hard carbons using polymer dopants for high-performance fuel cells
Source: Royal Society of Chemistry journal article supplement (doi:10.1039/d5ta08085a), 2025-11-19
Supplement: d5ta08085a1.pdf [file d5ta08085a1.pdf]

## Supporting Information

### Selective Nitrogen Doping on Porous Hard Carbons Using Polymer Dopants for High-Performance Fuel Cells

Yoon-A Jang <sup>a, †</sup>, Daehyeon Seo <sup>b, †</sup>, Taewook Kim <sup>a, c</sup>, Jae Hyun Park <sup>d</sup>, Youngkyu Bae <sup>d</sup>,  
Gilhwan Lee <sup>d</sup>, Young Jun Lee <sup>b, \*</sup>, Chan Ho Park <sup>a, \*</sup>

<sup>†</sup>These authors contributed equally to this work.

<sup>a</sup> Department of Chemical, Biological, and Battery Engineering, Gachon University, 1342 Seongnam-daero, Sujeong-gu, Seongnam-si, Gyeonggi-do, 13120, Republic of Korea

\* E-mail: chhopark@gachon.ac.kr (C. H. P.)

<sup>b</sup> Carbon Composite Materials Research Center, Korea Institute of Science and Technology, 92 Chudong-ro, Bongdong-eup, Wanju-gun, Jeonbuk, 55324, Republic of Korea

\* E-mail: youngjunlee@kist.re.kr (Y. J. L.)

<sup>c</sup> Thin Film Materials Research Center, Korea Research Institute of Chemical Technology, 141 Gajeong-ro, Yuseong-gu, Daejeon, 34114, Republic of Korea

<sup>d</sup> The Carbon Studio, 4, Techno 2-ro, Yuseong-gu, Daejeon, Republic of Korea

## Table of Contents

### Supplementary Figures S1-S15

|                                                                                                                                                                                                                                                                                  |     |
|----------------------------------------------------------------------------------------------------------------------------------------------------------------------------------------------------------------------------------------------------------------------------------|-----|
| ■ <b>Fig. S1.</b> $^1\text{H}$ NMR spectra of P4VP ( $M_n = 12.3$ kDa) in DMF- $d_7$ at room temperature.                                                                                                                                                                        | S5  |
| ■ <b>Fig. S2.</b> $M_n$ as a function of $[\text{Monomer}]/[\text{CTA}]$ for P4VP synthesized via RAFT polymerization. $M_n$ increases linearly with $[\text{M}]/[\text{CTA}]$ , following $M_n = 0.823 \times [\text{M}]/[\text{CTA}]$ ( $\text{kg mol}^{-1}$ , $R^2 = 0.98$ ). | S6  |
| ■ <b>Fig. S3.</b> FTIR spectra of PCC, P4VP, and PCC/P4VP complexes.                                                                                                                                                                                                             | S7  |
| ■ <b>Fig. S4.</b> TGA curves of PCC, P4VP, and PCC/P4VP complexes.                                                                                                                                                                                                               | S8  |
| ■ <b>Fig. S5.</b> SEM images of (a) PCC/P4VP complex (10:1) and (d) N-doped PCC (10:1). EDS mapping images of PCC/P4VP complex (10:1) and N-doped PCC (10:1), showing the distribution of (b, e) C (green) and (c, f) N (cyan).                                                  | S9  |
| ■ <b>Fig. S6.</b> Particle size distributions of PCC, PCC/P4VP complex (10:1), and N-doped PCC (10:1).                                                                                                                                                                           | S10 |
| ■ <b>Fig. S7.</b> High-resolution N 1s XPS spectra of P4VP-derived PCCs carbonized at (a) 700°C, (b) 850°C, and (c) 1000°C. (d) Relative contribution of N species (%) derived from N 1s deconvolution.                                                                          | S13 |
| ■ <b>Fig. S8.</b> High-resolution N 1s XPS spectra of N-doped PCC (20:1) obtained using (a) P4VP and (b) pyrrole as N sources.                                                                                                                                                   | S14 |
| ■ <b>Fig. S9.</b> Characterization of A4, FB, and N-doped A4, FB: (a) $\text{N}_2$ -sorption isotherms, and (b) pore size distribution curves obtained from BJH desorption analysis.                                                                                             | S18 |
| ■ <b>Fig. S10.</b> TEM images of (a) Pt/N-doped PCC (10:1) and (c) Pt/N-doped PCC (20:1), along with HR-TEM images of (b) Pt/N-doped PCC (10:1) and (d) Pt/N-doped PCC (20:1).                                                                                                   | S19 |
| ■ <b>Fig. S11.</b> STEM-HAADF image of (a) Pt/N-doped PCC (20:1) and corresponding EDS elemental maps showing (b) Pt (red), (c) C (green), and (d) N (blue) distributions.                                                                                                       | S20 |
| ■ <b>Fig. S12.</b> High-resolution XPS spectra of commercial Pt/C, Pt/PCC, and Pt/N-doped PCCs: (a) C 1s, (b) O 1s, and (c) Pt 4f.                                                                                                                                               | S22 |
| ■ <b>Fig. S13.</b> I-V polarization curves of (a) commercial Pt/C, (b) Pt/PCC, (c) Pt/N-doped PCC (10:1), and (d) Pt/N-doped PCC (20:1). The curves are shown for BOL, after 5,000, after 10,000, and after 30,000 cycles under 40% RH.                                          | S24 |
| ■ <b>Fig. S14.</b> CV curves of (a) commercial Pt/C, (b) Pt/PCC, (c) Pt/N-doped PCC (10:1), and (d) Pt/N-doped PCC (20:1). The curves are shown for BOL, after 5,000, after 10,000, and after 30,000 cycles under 100% RH.                                                       | S25 |
| ■ <b>Fig. S15.</b> EIS spectra of MEAs employing Pt/N-doped PCC (20:1), Pt/PCC, and commercial Pt/C as cathode catalysts, with commercial Pt/C as the anode under single-cell operation.                                                                                         | S26 |

## Supplementary Tables S1-S8

|                                                                                                                                             |     |
|---------------------------------------------------------------------------------------------------------------------------------------------|-----|
| ■ <b>Table S1.</b> Composition of PCC/P4VP complexes with different PCC-to-P4VP mass ratios.                                                | S4  |
| ■ <b>Table S2.</b> Elemental compositions (atomic %) of N-doped PCCs, as determined by XPS.                                                 | S11 |
| ■ <b>Table S3.</b> Elemental compositions (atomic %) of pristine PCC and P4VP-assisted N-doped PCCs with different P4VP molecular weights.  | S12 |
| ■ <b>Table S4.</b> Textural properties of pristine PCC and N-doped PCCs.                                                                    | S15 |
| ■ <b>Table S5.</b> Textural properties of A4, FB and N-doped A4, FB.                                                                        | S16 |
| ■ <b>Table S6.</b> Elemental compositions (atomic %) of A4, FB and N-doped A4, FB, as determined by XPS.                                    | S17 |
| ■ <b>Table S7.</b> Elemental compositions (atomic %) of the synthesized Pt at N-doped PCCs, obtained from EDS analysis conducted using TEM. | S21 |
| ■ <b>Table S8.</b> Elemental compositions (atomic %) of Pt in commercial Pt/C and Pt/PCC-based catalysts obtained from XPS analysis.        | S23 |

**Table S1.** Composition of PCC/P4VP complexes with different PCC-to-P4VP mass ratios.

| Sample                  | PCC (wt.%) | P4VP (wt.%) | PCC:P4VP ratio (w/w) |
|-------------------------|------------|-------------|----------------------|
| PCC                     | 100        | 0           |                      |
| PCC/P4VP complex (10:1) | 10         | 1           | 10:1                 |
| PCC/P4VP complex (20:1) | 20         | 1           | 20:1                 |

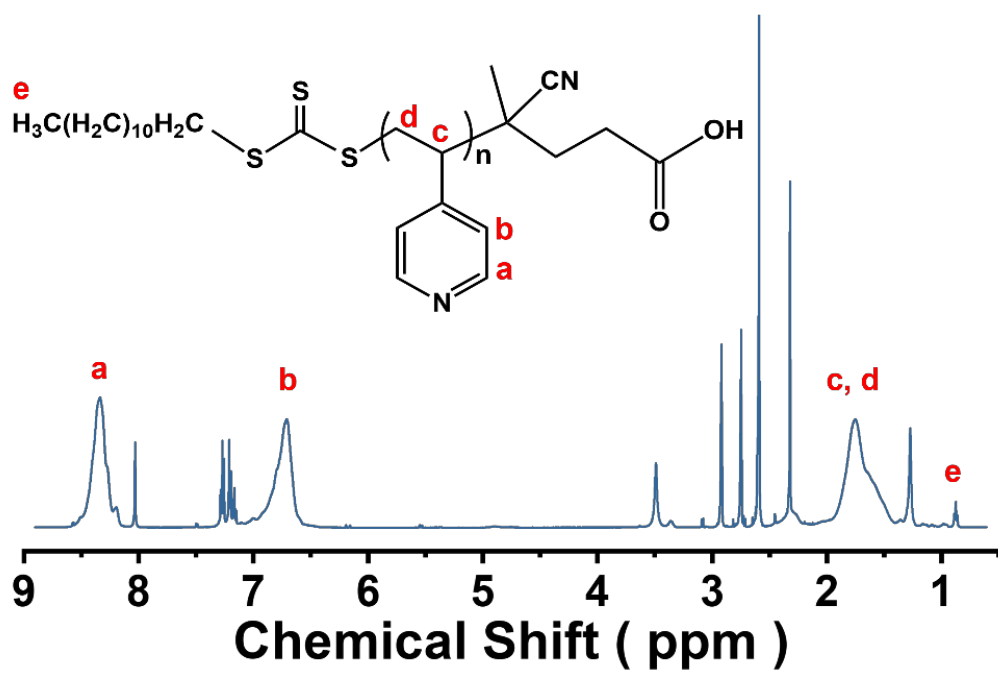

**Fig. S1.** <sup>1</sup>H NMR spectra of P4VP ( $M_n = 12.3$  kDa) in DMF- $\text{d}_7$  at room temperature.

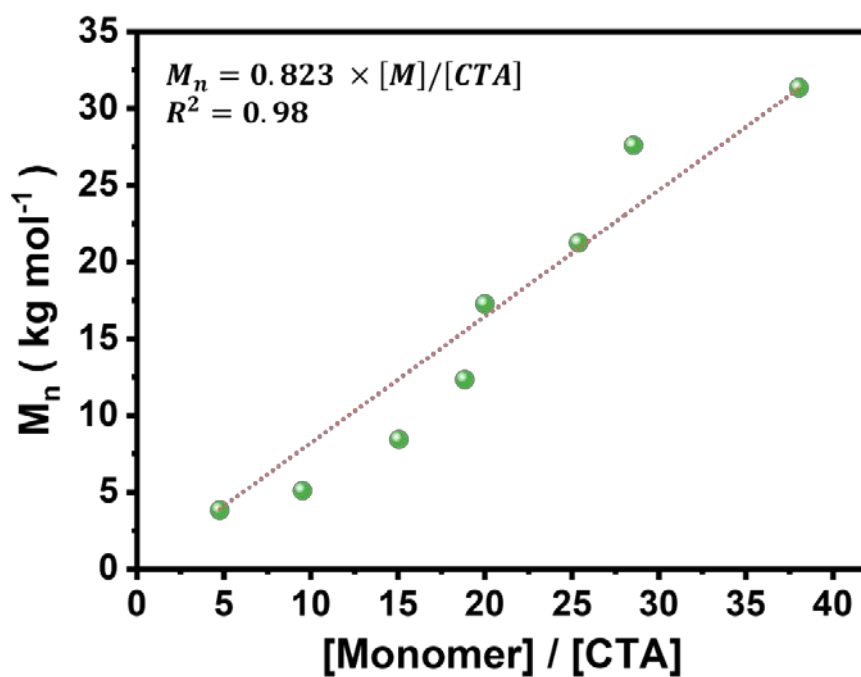

**Fig. S2.**  $M_n$  as a function of  $[Monomer]/[CTA]$  for P4VP synthesized via RAFT polymerization.  $M_n$  increases linearly with  $[M]/[CTA]$ , following  $M_n = 0.823 \times [M]/[CTA]$  ( $\text{kg mol}^{-1}$ ,  $R^2 = 0.98$ ).

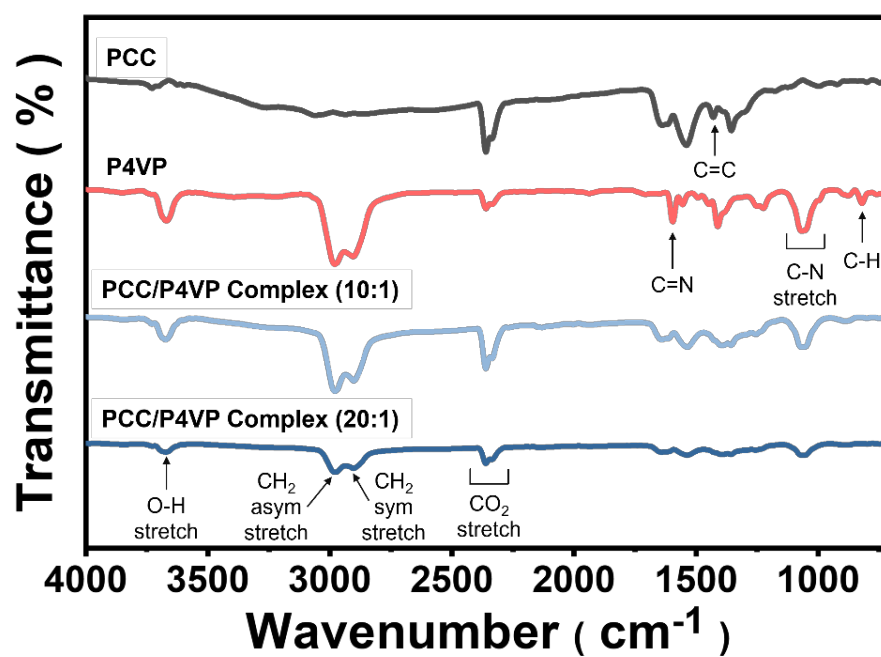

**Fig. S3.** FTIR spectra of PCC, P4VP, and PCC/P4VP complexes.

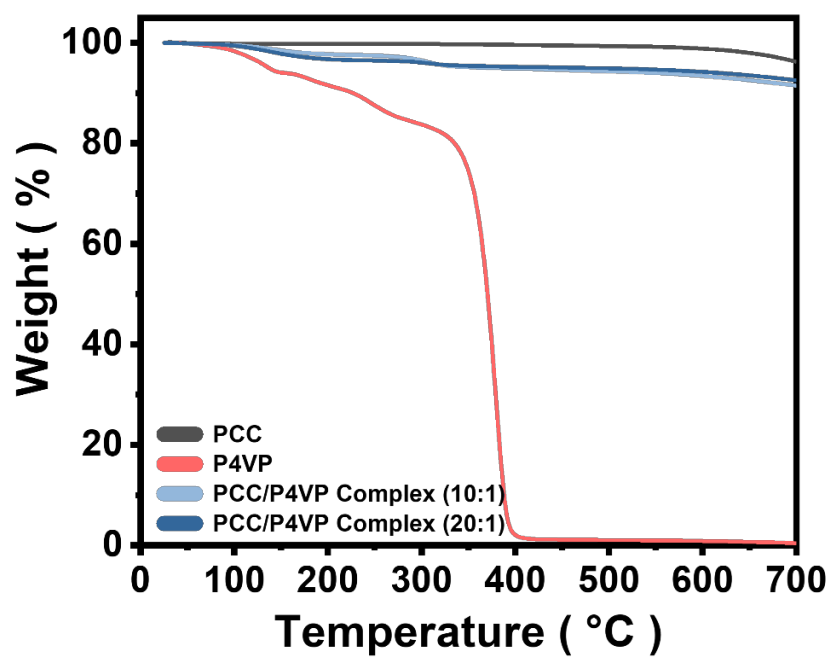

**Fig. S4.** TGA curves of PCC, P4VP, and PCC/P4VP complexes.

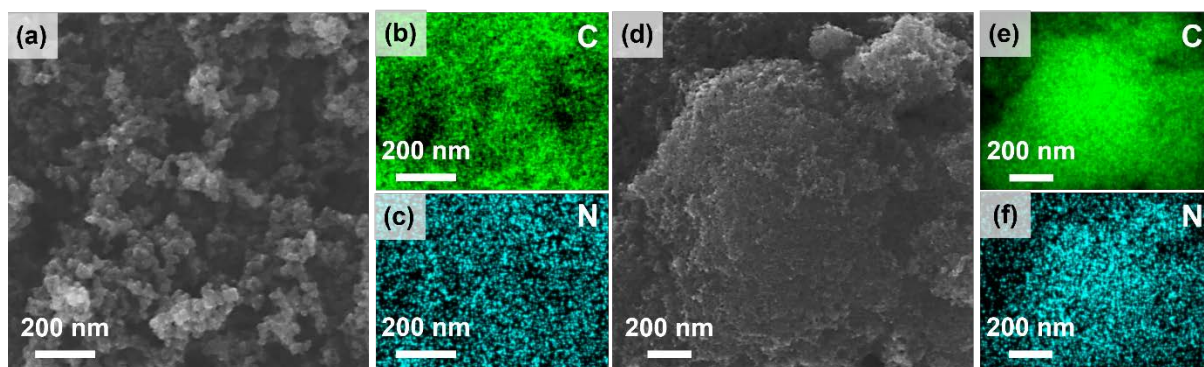

**Fig. S5.** SEM images of (a) PCC/P4VP complex (10:1) and (d) N-doped PCC (10:1). EDS mapping images of PCC/P4VP complex (10:1) and N-doped PCC (10:1), showing the distribution of (b, e) C (green) and (c, f) N (cyan).

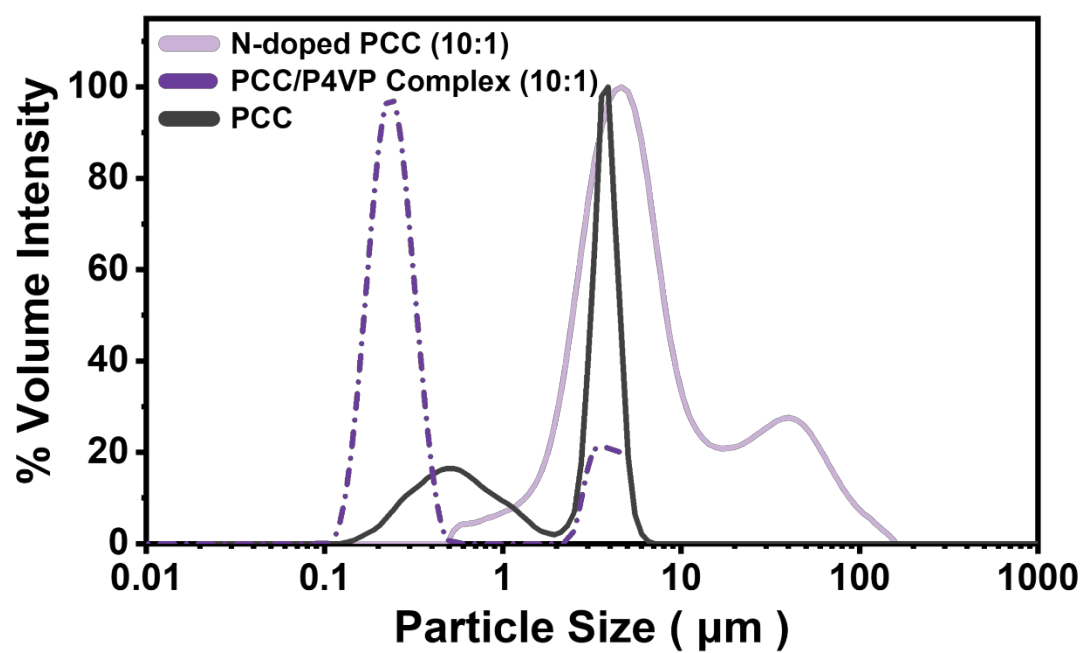

**Fig. S6.** Particle size distributions of PCC, PCC/P4VP complex (10:1), and N-doped PCC (10:1).

**Table S2.** Elemental compositions (atomic %) of N-doped PCCs, as determined by XPS.

| <b>Sample</b>      | <b>C (at. %)</b> | <b>O (at. %)</b> | <b>N (at. %)</b> |
|--------------------|------------------|------------------|------------------|
| N-doped PCC (10:1) | 97.81            | 0.52             | 1.68             |
| N-doped PCC (20:1) | 97.93            | 1.16             | 0.91             |

**Table S3.** Elemental compositions (atomic %) of pristine PCC and P4VP-assisted N-doped PCCs with different P4VP molecular weights.

| No. | Sample       | Sample Conditions                    |                  |                       | XPS-derived elemental composition |           |           |
|-----|--------------|--------------------------------------|------------------|-----------------------|-----------------------------------|-----------|-----------|
|     |              | Synthesis method of P4VP             | P4VP $M_n$ (kDa) | PCC:P4VP ratio (wt.%) | C (at. %)                         | O (at. %) | N (at. %) |
| 1   | PCC          | -                                    | -                | -                     | 96.98                             | 3.02      | -         |
| 2   | N-doped PCCs | RAFT polymerization                  | 12               | 10:1                  | 97.81                             | 0.52      | 1.68      |
| 3   |              | Commercial (purchased Sigma-Aldrich) | 60               |                       | 98.17                             | 0.96      | 0.87      |

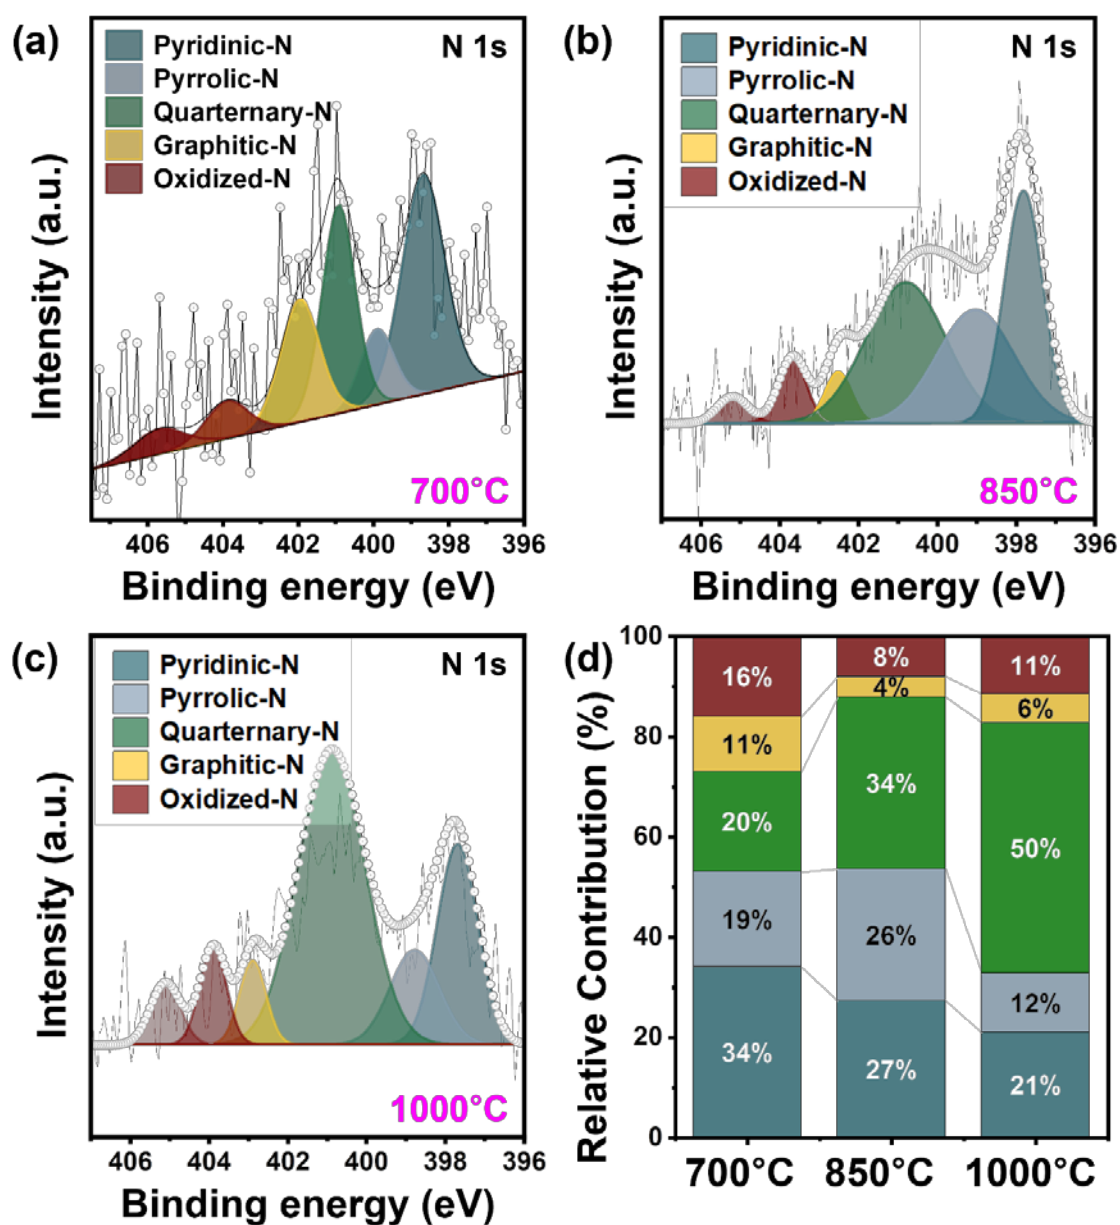

**Fig. S7.** High-resolution N 1s XPS spectra of P4VP-derived PCCs carbonized at (a) 700 °C, (b) 850 °C, and (c) 1000 °C. (d) Relative contribution of N species (%) derived from N 1s deconvolution.

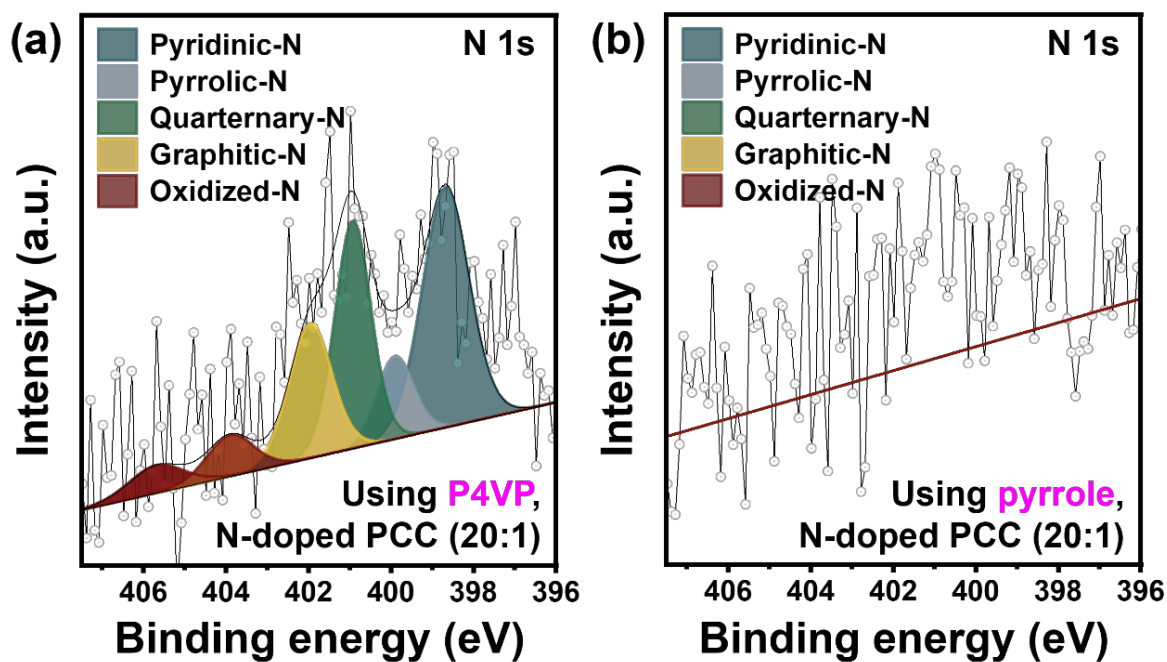

**Fig. S8.** High-resolution N 1s XPS spectra of N-doped PCC (20:1) obtained using (a) P4VP and (b) pyrrole as N sources.

**Table S4.** Textural properties of pristine PCC and N-doped PCCs.

| Sample             | BET SSA<br>(m <sup>2</sup> g <sup>-1</sup> ) | Micro SSA by<br>t-plot (m <sup>2</sup> g <sup>-1</sup> ) | Micro SSA<br>ratio (%) | Pore<br>Volume<br>(cm <sup>3</sup> g <sup>-1</sup> ) | Average Pore<br>Width (nm) |
|--------------------|----------------------------------------------|----------------------------------------------------------|------------------------|------------------------------------------------------|----------------------------|
| PCC                | 600.13                                       | 108.46                                                   | 18.07                  | 1.41                                                 | 8.07                       |
| N-doped PCC (10:1) | 446.51                                       | 58.81                                                    | 13.17                  | 1.47                                                 | 9.68                       |
| N-doped PCC (20:1) | 399.46                                       | 63.95                                                    | 16.01                  | 1.33                                                 | 9.34                       |

**Table S5.** Textural properties of A4, FB and N-doped A4, FB.

| <b>Sample</b> | <b>BET SSA<br/>(m<sup>2</sup> g<sup>-1</sup>)</b> | <b>Micro SSA by<br/>t-plot (m<sup>2</sup> g<sup>-1</sup>)</b> | <b>Micro SSA<br/>ratio (%)</b> | <b>Pore<br/>Volume<br/>(cm<sup>3</sup> g<sup>-1</sup>)</b> | <b>Average Pore<br/>Width (nm)</b> |
|---------------|---------------------------------------------------|---------------------------------------------------------------|--------------------------------|------------------------------------------------------------|------------------------------------|
| A4            | 449.53                                            | 74.72                                                         | 16.62                          | 0.83                                                       | 6.68                               |
| N-doped A4    | 328.28                                            | 42.96                                                         | 13.09                          | 0.83                                                       | 10.11                              |
| FB            | 1100.66                                           | 151.13                                                        | 13.73                          | 1.91                                                       | 6.74                               |
| N-doped FB    | 780.74                                            | 52.46                                                         | 6.72                           | 1.75                                                       | 7.37                               |

**Table S6.** Elemental compositions (atomic %) of A4, FB and N-doped A4, FB, as determined by XPS.

| Sample     | C (at. %) | O (at. %) | N (at. %) |
|------------|-----------|-----------|-----------|
| A4         | 97.06     | 2.94      |           |
| N-doped A4 | 98.27     | 0.60      | 1.13      |
| FB         | 97.43     | 2.57      |           |
| N-doped FB | 97.89     | 1.10      | 1.01      |

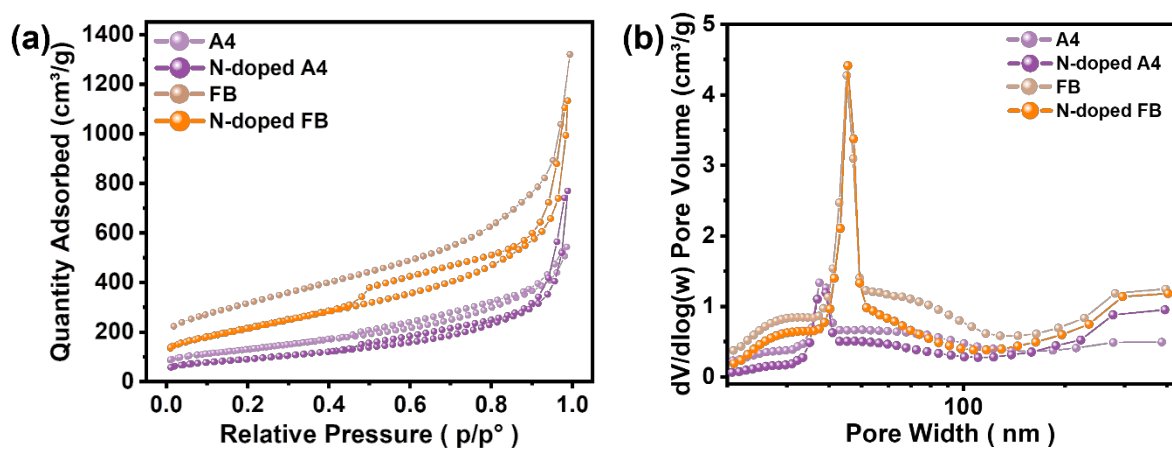

**Fig. S9.** Characterization of A4, FB, and N-doped A4, FB: (a) N<sub>2</sub>-sorption isotherms, and (b) pore size distribution curves obtained from BJH desorption analysis.

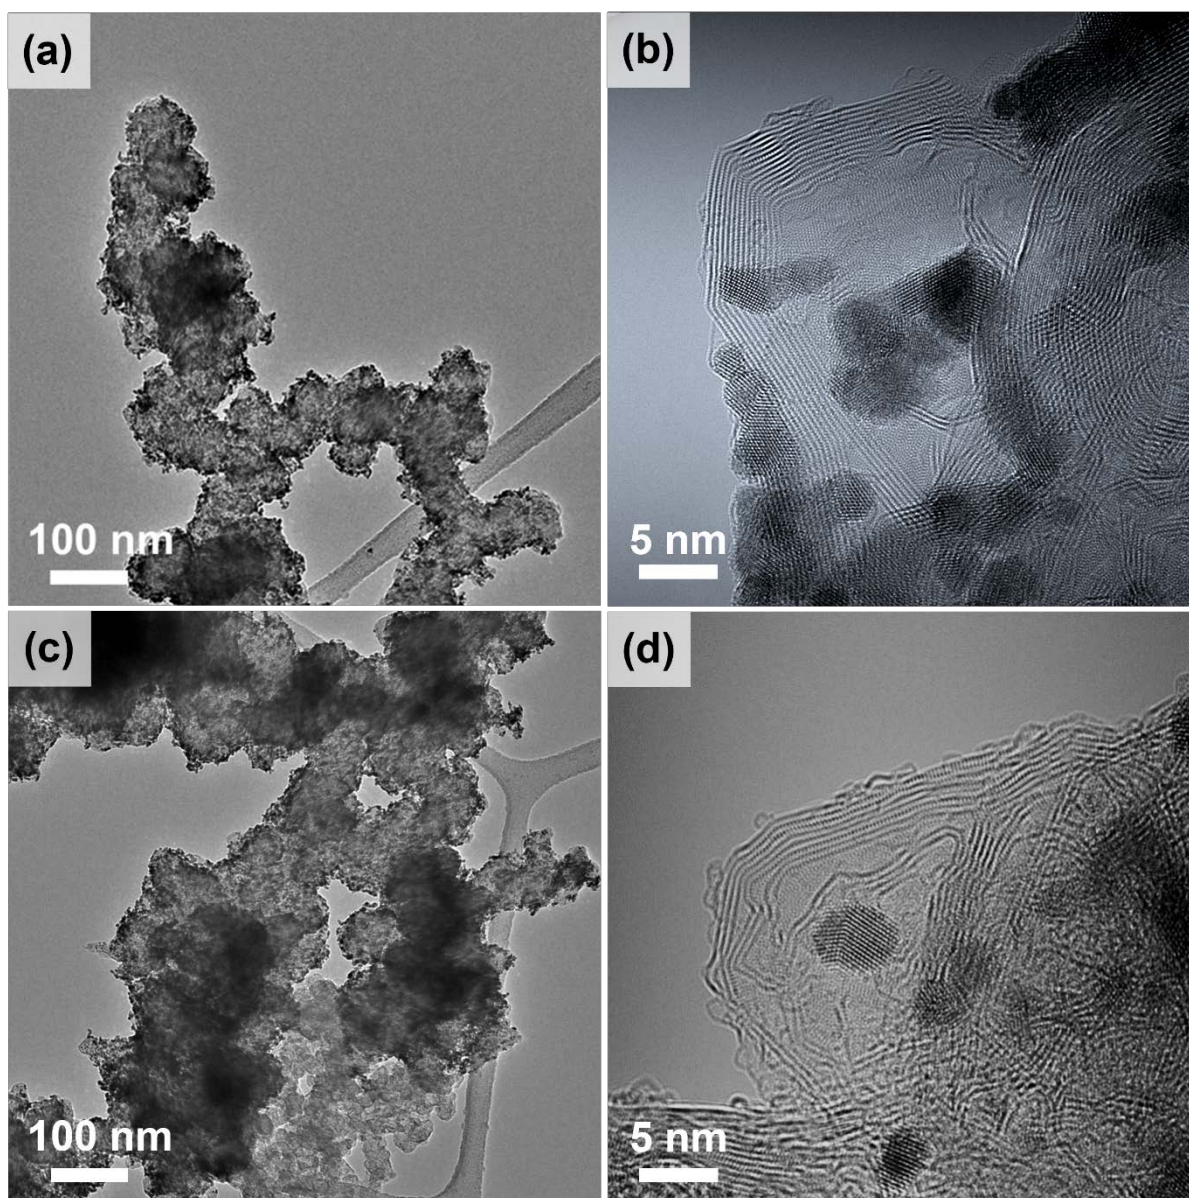

**Fig. S10.** TEM images of (a) Pt/N-doped PCC (10:1) and (c) Pt/N-doped PCC (20:1), along with HR-TEM images of (b) Pt/N-doped PCC (10:1) and (d) Pt/N-doped PCC (20:1).

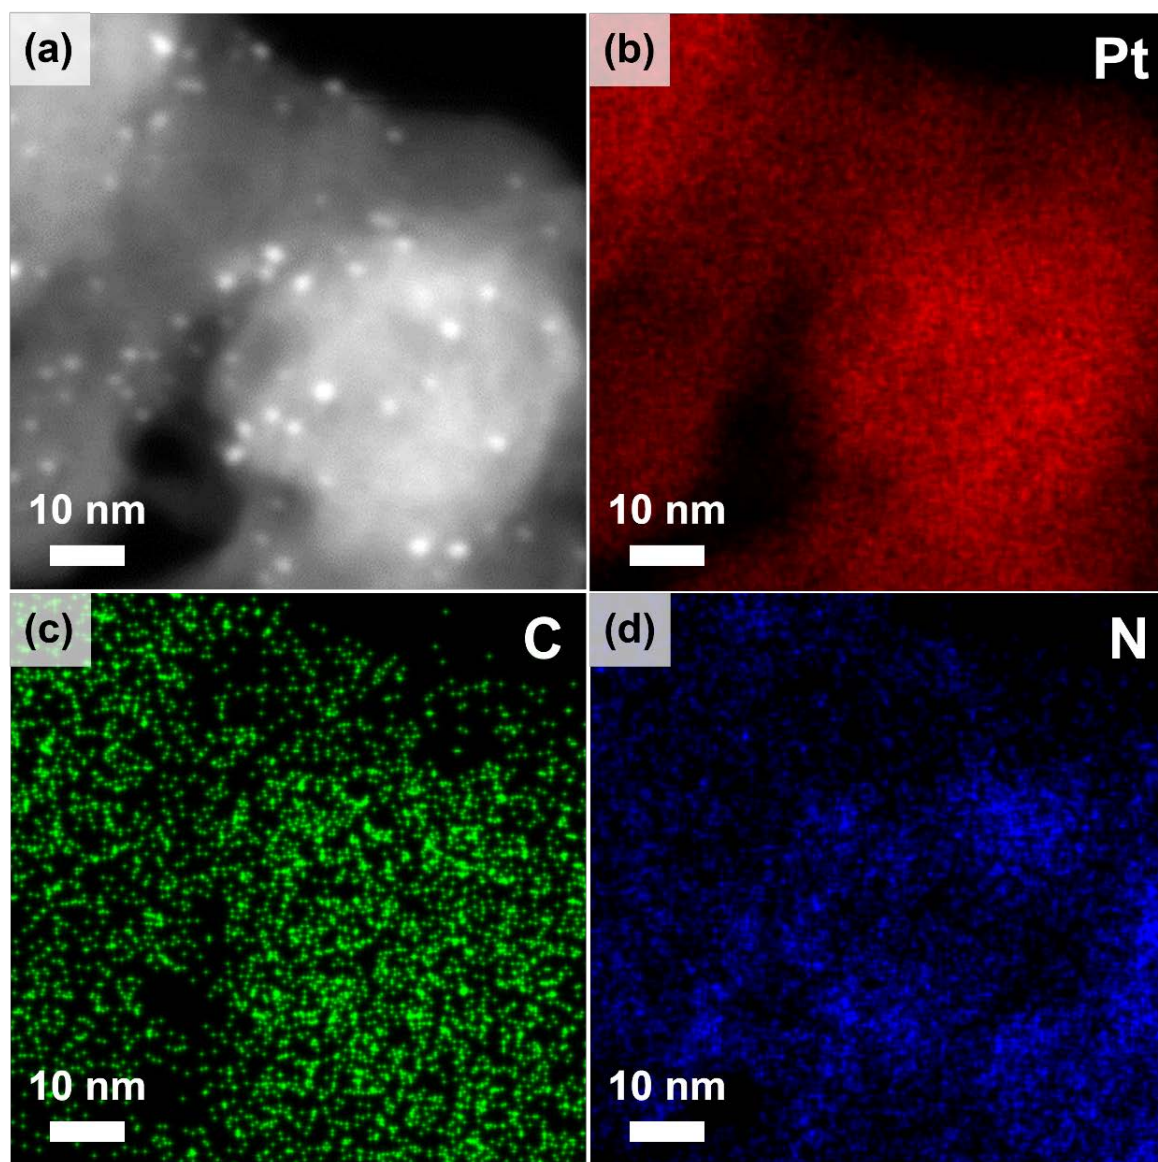

**Fig. S11.** STEM-HAADF image of (a) Pt/N-doped PCC (20:1) and corresponding EDS elemental maps showing (b) Pt (red), (c) C (green), and (d) N (blue) distributions.

**Table S7.** Elemental compositions (atomic %) of the synthesized Pt at N-doped PCCs, obtained from EDS analysis conducted using TEM.

| <b>Sample</b>         | <b>C (at. %)</b> | <b>O (at. %)</b> | <b>N (at. %)</b> | <b>Pt (at. %)</b> |
|-----------------------|------------------|------------------|------------------|-------------------|
| Pt/N-doped PCC (10:1) | 95.75            | 1.53             | 0.19             | 2.53              |
| Pt/N-doped PCC (20:1) | 95.06            | 1.26             | 0.48             | 3.20              |

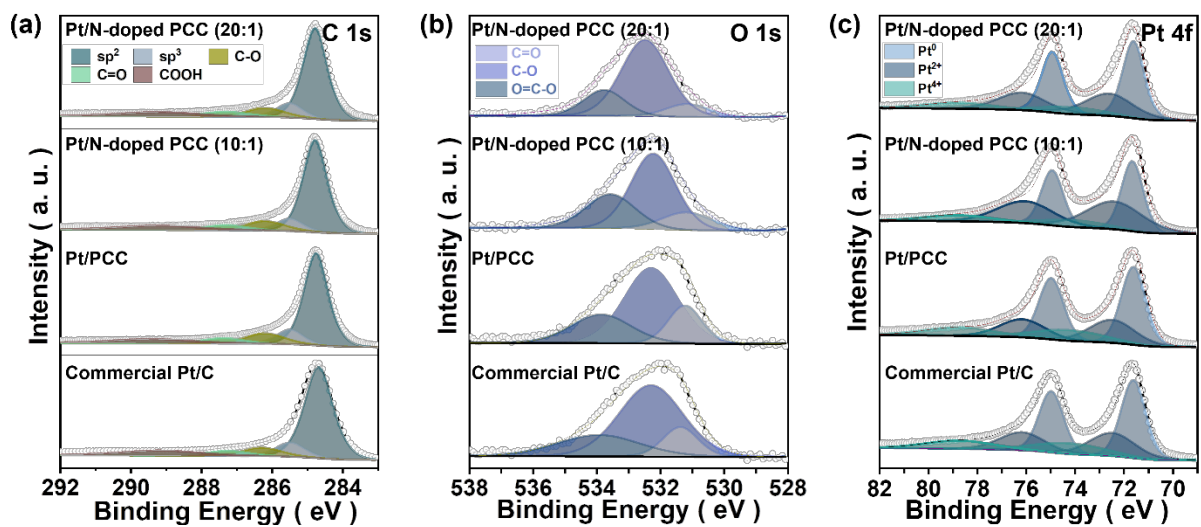

**Fig. S12.** High-resolution XPS spectra of commercial Pt/C, Pt/PCC, and Pt/N-doped PCCs: (a) C 1s, (b) O 1s, and (c) Pt 4f.

**Table S8.** Elemental compositions (atomic %) of Pt in commercial Pt/C and Pt/PCC-based catalysts obtained from XPS analysis.

| <b>Sample</b>         | <b>Pt<sup>0</sup> (at. %)</b> | <b>Pt<sup>2+</sup> (at. %)</b> | <b>Pt<sup>4+</sup> (at. %)</b> |
|-----------------------|-------------------------------|--------------------------------|--------------------------------|
| Commercial Pt/C       | 51.9                          | 38.7                           | 9.4                            |
| Pt/PCC                | 69.7                          | 24.1                           | 6.2                            |
| Pt/N-doped PCC (10:1) | 68.6                          | 27.3                           | 4.1                            |
| Pt/N-doped PCC (20:1) | 65.2                          | 27.5                           | 7.3                            |

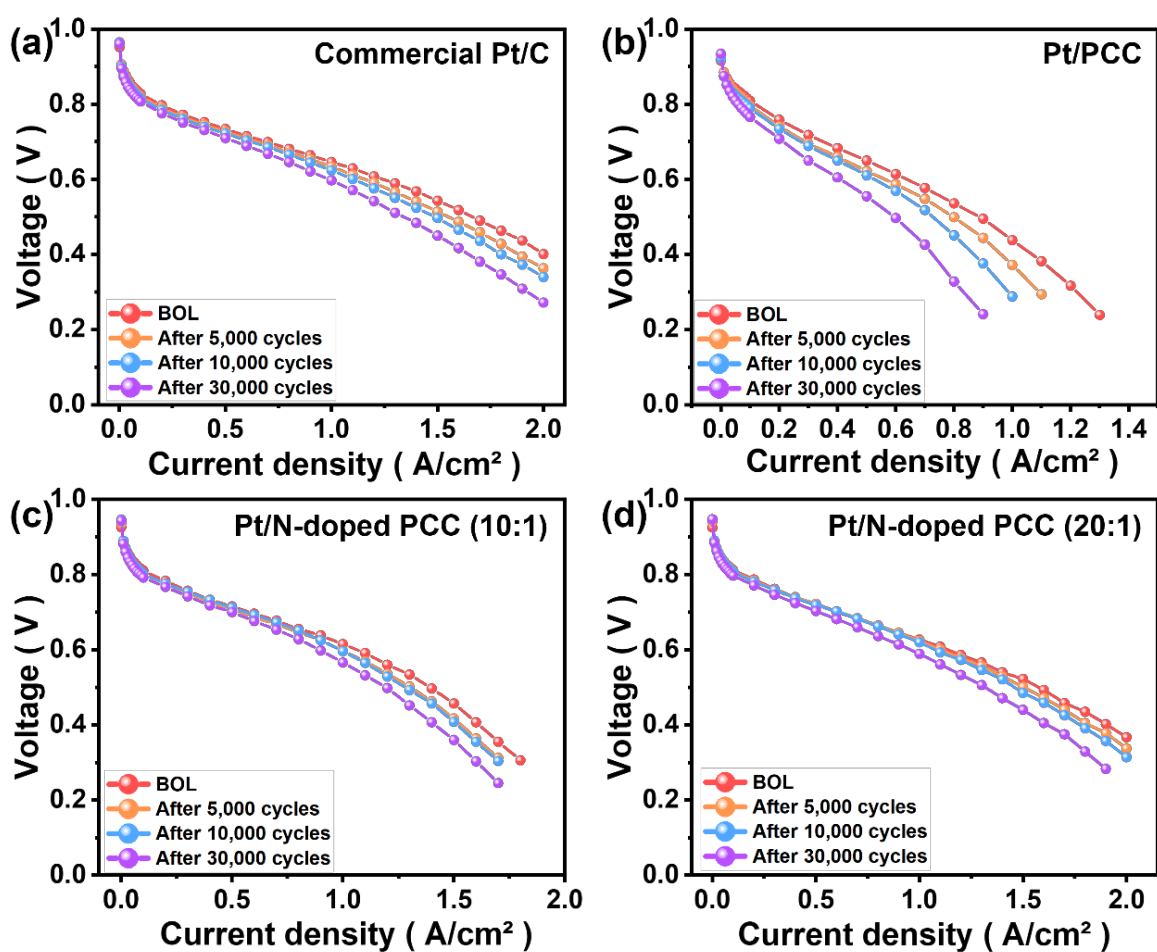

**Fig. S13.** I-V polarization curves of (a) commercial Pt/C, (b) Pt/PCC, (c) Pt/N-doped PCC (10:1), and (d) Pt/N-doped PCC (20:1). The curves are shown for BOL, after 5,000, after 10,000, and after 30,000 cycles under 40% RH.

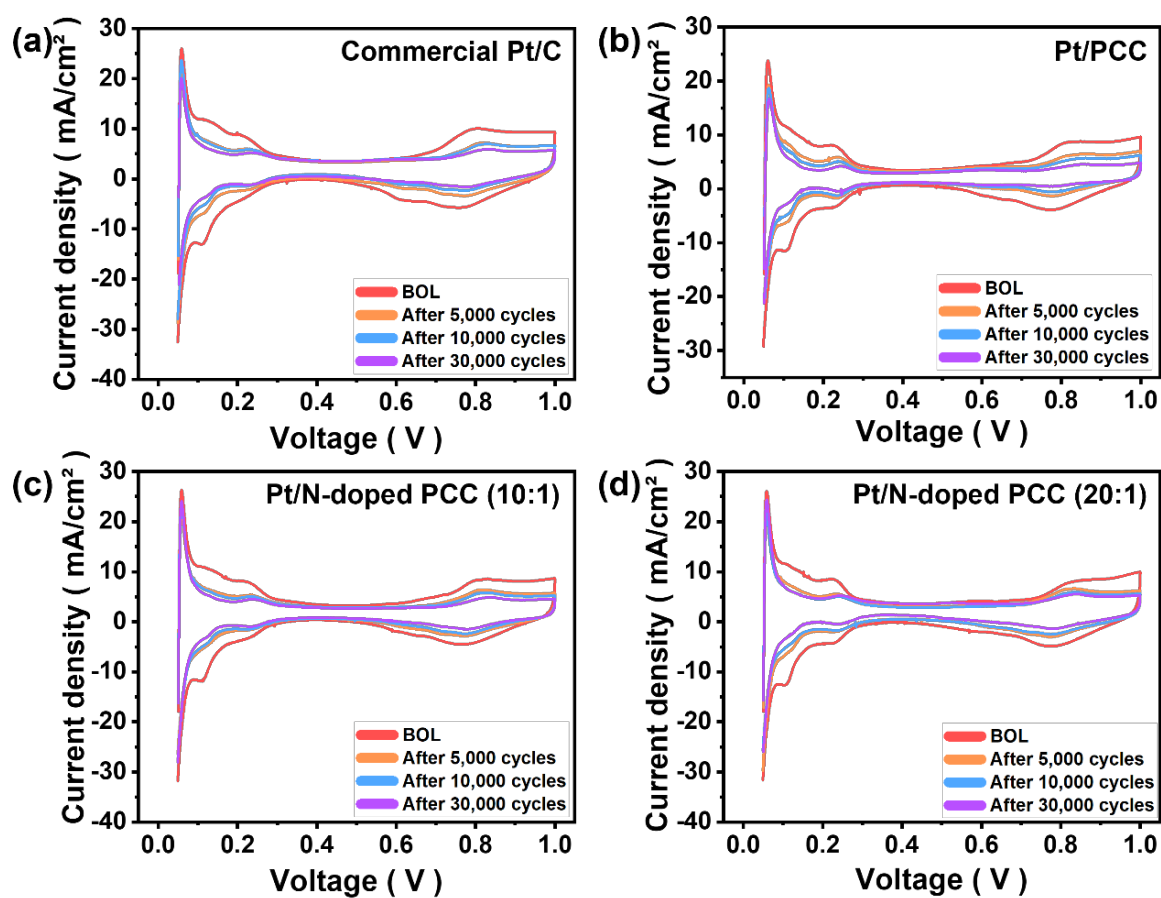

**Fig. S14.** CV curves of (a) commercial Pt/C, (b) Pt/PCC, (c) Pt/N-doped PCC (10:1), and (d) Pt/N-doped PCC (20:1). The curves are shown for BOL, after 5,000, after 10,000, and after 30,000 cycles under 100% RH.

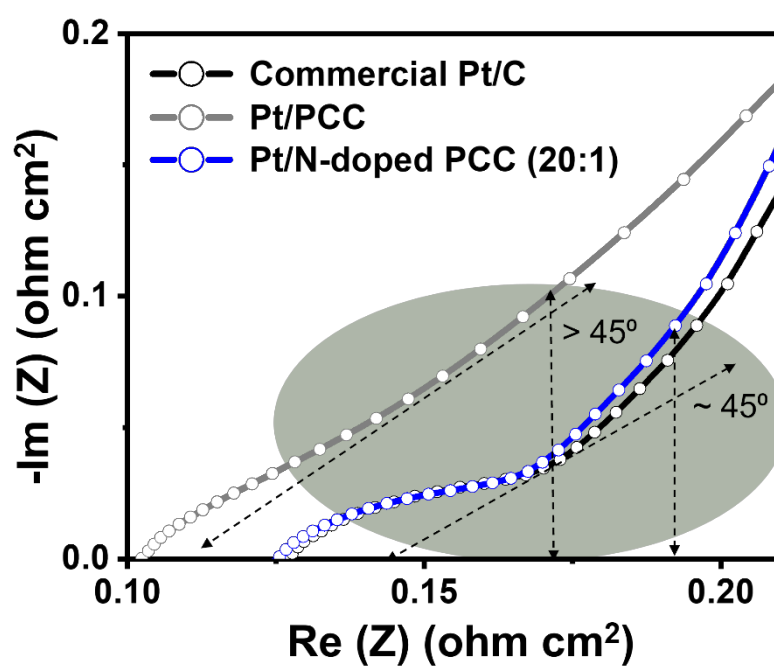

**Fig. S15.** EIS spectra of MEAs employing Pt/N-doped PCC (20:1), Pt/PCC, and commercial Pt/C as cathode catalysts, with commercial Pt/C as the anode under single-cell operation.
